# Supplementary material for: Predictors of Exclusive Breastfeeding Among Infants Below Six Months: A Multilevel Analysis of Nigeria Demographic Health Survey
Source: Research Square preprint supplement (doi:10.21203/rs.3.rs-6536288/v1), 2025-05-07
Supplement: Supplementary file 1 [file c520c127e10415c1f2d60c28.docx]

Supplementary Table 1: Generalized Variance Inflation Factor

| **Variables** | **VIF** | **1/VIF** | **GVIF** |
| --- | --- | --- | --- |
| **Child age** |  |  |  |
| 2-3 months | 1.43 | 0.70 | 1.19 |
| 4-5 months | 1.46 | 0.69 | 1.21 |
|  |  |  |  |
| **Fever** |  |  |  |
| had fever | 1.12 | 0.89 | 1.06 |
|  |  |  |  |
| **Initiation of breastfeeding** |  |  |  |
| more than an hour | 1.16 | 0.86 | 1.08 |
|  |  |  |  |
| **Maternal age** |  |  |  |
| 20-24 | 2.92 | 0.34 | 1.71 |
| 25-29 | 4.52 | 0.22 | 2.13 |
| 30-34 | 4.25 | 0.24 | 2.06 |
| 35-39 | 3.21 | 0.31 | 1.79 |
| 40-44 | 1.93 | 0.52 | 1.39 |
| 45-49 | 1.29 | 0.77 | 1.14 |
|  |  |  |  |
| **Religion** |  |  |  |
| Islam | 2.62 | 0.38 | 1.62 |
| other | 1.08 | 0.93 | 1.04 |
|  |  |  |  |
| **Marital status** |  |  |  |
| in union | 1.86 | 0.54 | 1.36 |
| divorced/seperated/widowed | 1.84 | 0.54 | 1.36 |
|  |  |  |  |
| **Parity** |  |  |  |
| 2 | 1.89 | 0.53 | 1.38 |
| 3 | 2.05 | 0.49 | 1.43 |
| 4+ | 3.83 | 0.26 | 1.96 |
|  |  |  |  |
| **Maternal occupation** |  |  |  |
| professional/technical/managerial | 1.34 | 0.74 | 1.16 |
| clerical | 1.08 | 0.92 | 1.04 |
| sales | 1.53 | 0.65 | 1.24 |
| agriculture | 1.36 | 0.73 | 1.17 |
| others | 1.61 | 0.62 | 1.27 |
|  |  |  |  |
| **Wealth** |  |  |  |
| poorer | 1.87 | 0.53 | 1.37 |
| middle | 3.43 | 0.29 | 1.85 |
| richer | 5.04 | 0.20 | 2.25 |
| richest | 6.24 | 0.16 | 2.51 |
|  |  |  |  |
| **Number of anc visits** |  |  |  |
| < 4 | 1.62 | 0.62 | 1.27 |
| 4 or more | 2.44 | 0.41 | 1.56 |
|  |  |  |  |
| **Mode of delivery** |  |  |  |
| caesarean section | 1.15 | 0.87 | 1.07 |
|  |  |  |  |
| **Frequency of listening to radio** |  |  |  |
| at least once a week | 1.34 | 0.75 | 1.16 |
|  |  |  |  |
| **Frequency of reading newspaper/magazine** |  |  |  |
| at least once a week | 1.15 | 0.87 | 1.07 |
|  |  |  |  |
| **Frequency of watching television** |  |  |  |
| at least once a week | 2.93 | 0.34 | 1.71 |
|  |  |  |  |
| **Place of residence** |  |  |  |
| rural | 2.15 | 0.46 | 1.47 |
|  |  |  |  |
| **Region** |  |  |  |
| north east | 2.11 | 0.47 | 1.46 |
| north west | 2.62 | 0.38 | 1.62 |
| south east | 2.12 | 0.47 | 1.46 |
| south south | 1.71 | 0.58 | 1.31 |
| south west | 1.97 | 0.51 | 1.4 |
|  |  |  |  |
| **Community level of education** |  |  |  |
| high | 2.16 | 0.46 | 1.47 |
|  |  |  |  |
| **Community level of media exposure** |  |  |  |
| high | 4.91 | 0.20 | 2.21 |
|  |  |  |  |
| **Community level of ANC** |  |  |  |
| high | 1.73 | 0.58 | 1.32 |
|  |  |  |  |
| **Community level of povery** |  |  |  |
| high | 3.58 | 0.28 | 1.89 |
